# Supplementary material
Source: PubMed Central journal article supplement (PMC5981078)
Supplement: AEM.00559-18_zam012188566s1.pdf [file AEM.00559-18_zam012188566s1.pdf]

## Supplemental materials of

**Distinct nitrite and nitric oxide physiology in *Escherichia coli* and *Shewanella oneidensis***

**Qiu Meng,<sup>a</sup> Jianhua Yin,<sup>a,b</sup> Miao Jin,<sup>a</sup> and Haichun Gao<sup>a\*</sup>**

<sup>a</sup>Institute of Microbiology and College of Life Sciences, Zhejiang University, Hangzhou, Zhejiang, China

<sup>b</sup>College of Biotechnology and Bioengineering, Zhejiang University of Technology, Hangzhou, Zhejiang, China

**A**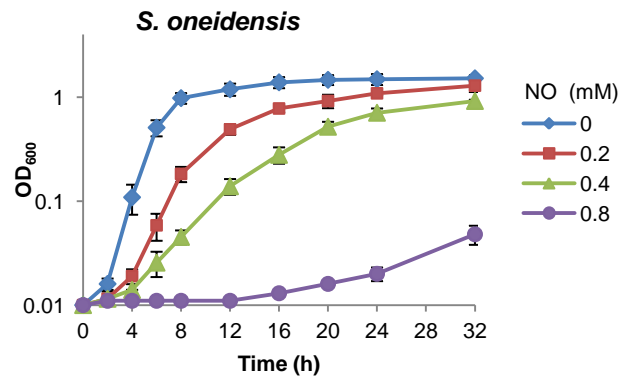**B**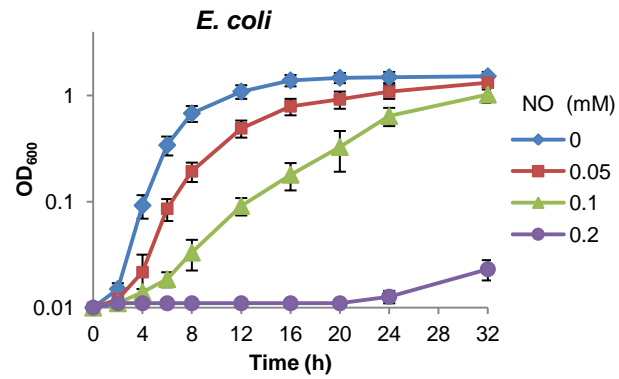

**FIG S1** Inhibition of NO released from DETA-NONOate at varying concentrations on growth in liquid media. **(A)** On *S. oneidensis*. **(B)** On *E. coli*. Data are shown as mean  $\pm$  SEM from at least three experiments.

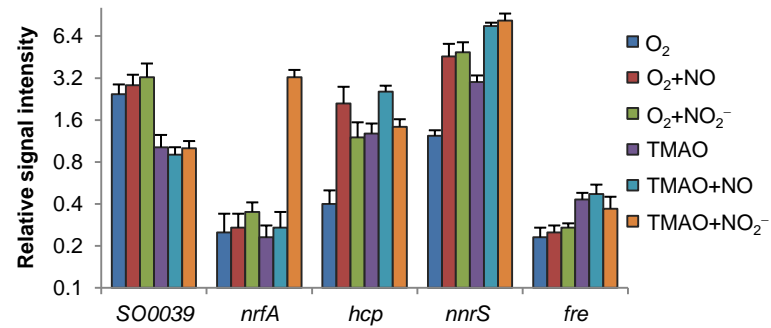

**FIG S2 qRT-PCR analysis of RNA extracted from mid-log growing cells.** Cells were prepared the same as in Fig. 3A. All data were normalized to expression of the *arcA* rRNA gene, which was constant during the exponential growth phase. Numbers reported are standardized to expression of the reference gene. Data are shown as mean  $\pm$  SEM from at least three experiments.

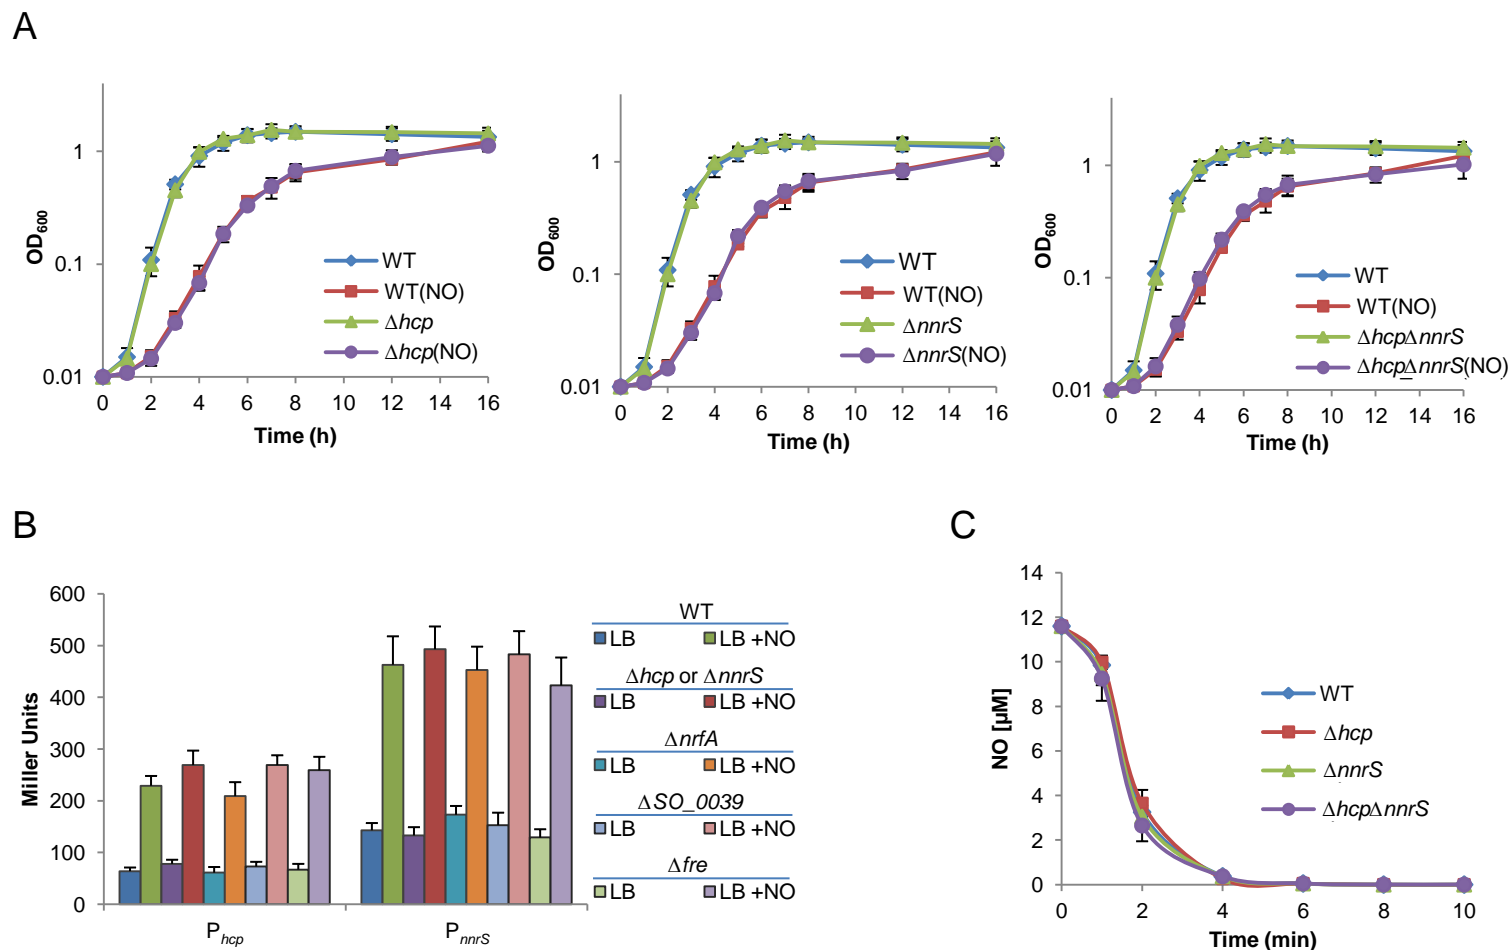

**FIG S3 Impacts of Hcp, NnrS, SO\_0039, and Fre on NO resistance and removal.** (A) Effects of indicated proteins on NO-induced growth inhibition. Growth of WT,  $\Delta hcp$ ,  $\Delta SO\_0039$ ,  $\Delta nnrS$ ,  $\Delta fre$ , and  $\Delta hcp\Delta nnrS$ , in LB without or with 0.4 mM DETA-NONOate was compared. In all cases, difference was insignificant. Only  $\Delta hcp$ ,  $\Delta nnrS$ , and  $\Delta hcp\Delta nnrS$  were shown because these two genes are responsive to NO. (B) Promoter activity measurement of  $P_{nrfA}$ ,  $P_{SO0039}$ ,  $P_{hcp}$ ,  $P_{nnrS}$ , and  $P_{fre}$  by an integrated *lacZ* reporter in strains lacking one of these genes. Mutation of a single gene did not significantly affect expression of the other genes. Only data for *hcp* and *nnrS* genes were shown. (C) Effects of indicated proteins on NO consumption. Data are shown as mean  $\pm$  SEM from at least three experiments.

A

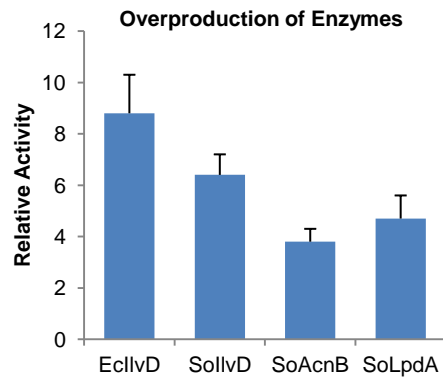

B

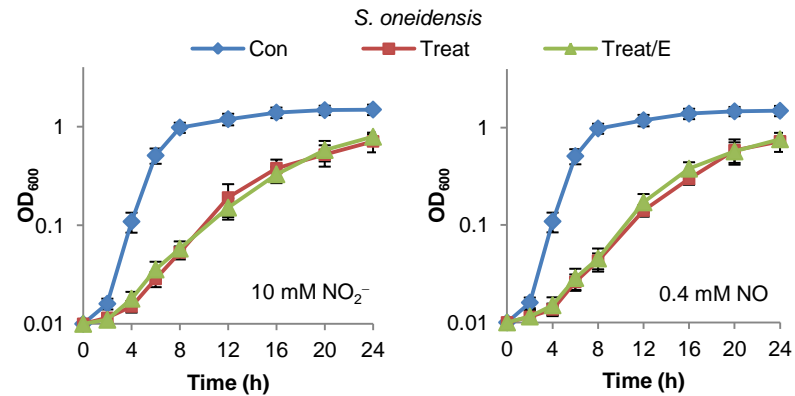

**FIG S4 Validation of enzyme overproduction.** Controlled expression of indicated genes was carried out by using IPTG-inducible promoter *Ptac*. The expression system is effective, validated previously and here by measuring respective enzyme activities. Relative activity is given by normalizing to the wild-type containing empty vector. (B) Effects of overproduction of *EcllVD* on growth of *S. oneidensis*. Con, grown in LB; Treat, grown in LB with either 0.4 mM NO or 10 mM nitrite; Treat/E, cells with overproduced *SollVD* in the presence of 1 mM IPTG. Data are shown as mean  $\pm$  SEM from at least three experiments.
